# Supplementary material for: Electrochemical Detection of Bisphenol A Based on Gold Nanoparticles/Multi-Walled Carbon Nanotubes: Applications on Glassy Carbon and Screen Printed Electrodes
Source: MDPI journal article supplement (doi:10.3390/s24082570), 2024-04-17
Supplement: s1 [file s1]

## Supplementary Materials

### Electrochemical Detection of Bisphenol A Based on Gold Nanoparticles/Multi-Walled Carbon Nanotubes: Applications on Glassy Carbon and Screen Printed Electrodes

Maximina Luis-Sunga <sup>1,2</sup>, Soledad Carinelli <sup>1,3,\*</sup>, Gonzalo García <sup>2</sup>, José Luis González-Mora <sup>1,3,4</sup> and Pedro A. Salazar-Carballo <sup>1</sup>

<sup>1</sup> *Laboratory of Sensors, Biosensors and Advanced Materials, Faculty of Health Sciences, Universidad de La Laguna, Campus de Ofra s/n, 38071 La Laguna, Spain*

<sup>2</sup> *Departamento de Química, Instituto Universitario de Materiales y Nanotecnología, Universidad de La Laguna, P.O. Box 456, 38200 La Laguna, Spain*

<sup>3</sup> *Departamento de Ciencias Médicas Básicas and Instituto de Tecnologías Biomédicas, Universidad de La Laguna, 38200 La Laguna, Spain*

<sup>4</sup> *Instituto Universitario de Neurociencia, Universidad de la Laguna, 38071 Santa Cruz de Tenerife, Spain*

\* *Correspondence: scarinel@ull.edu.es*

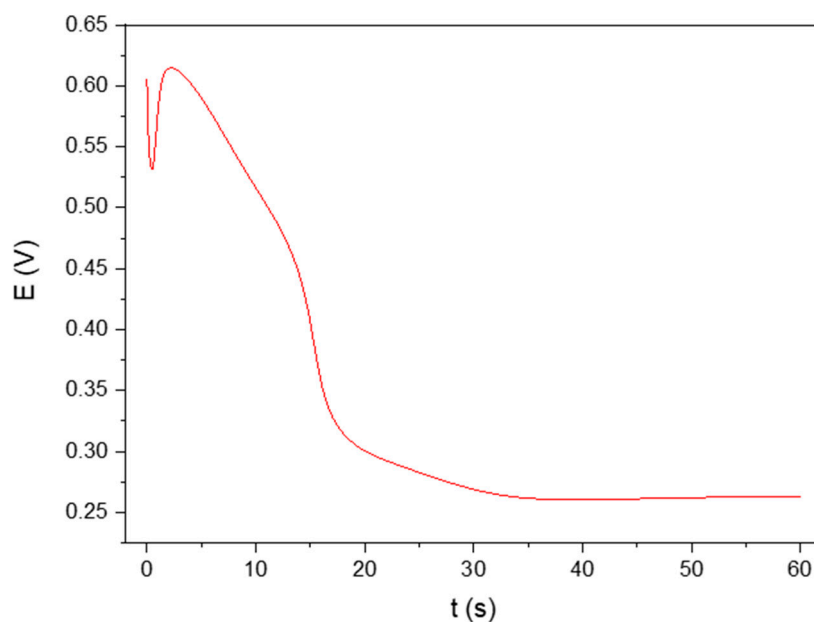

**Figure S1.** Typical potential transient obtained during galvanostatic Au deposition on GCE.

Plating bath: 3 mM HAuCl<sub>4</sub>. Applied current pulse: -25  $\mu$ A for 60 s.

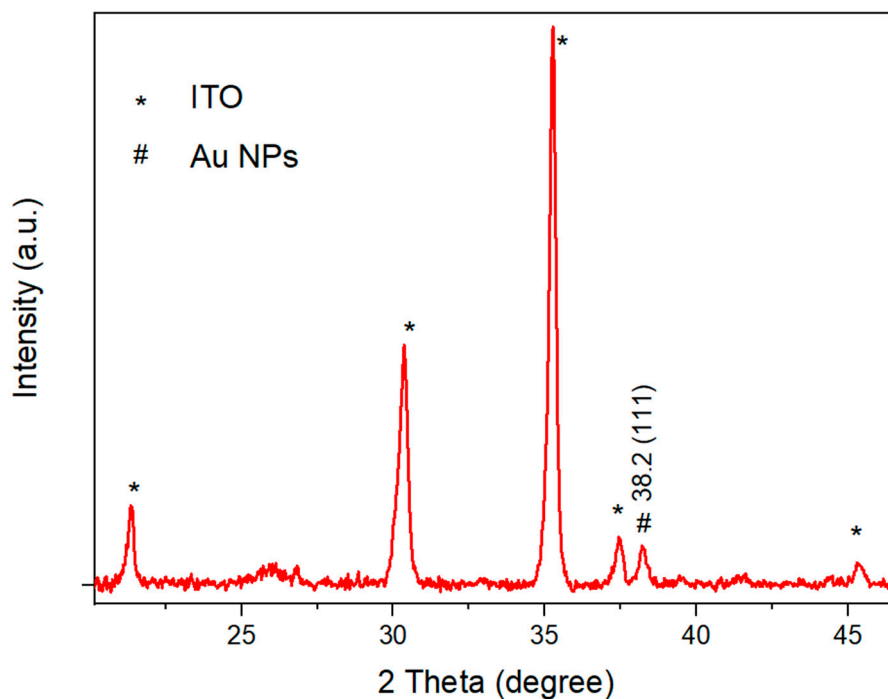

**Figure S2.** X-ray diffractogram for a CNT/Au nanocomposite deposited onto an indium-tin oxide (ITO) electrode.

**Table S1.** Parameters values obtained from the EIS data fitting for different sensor configurations.

|                                  | GCE  | GCE@Au | GCE/CNT | GCE/CNT@Au |
|----------------------------------|------|--------|---------|------------|
| <b>Rs (<math>\Omega</math>)</b>  | 92.5 | 89.3   | 86.8    | 87.8       |
| <b>Rct (<math>\Omega</math>)</b> | 538  | 398.4  | 278.7   | 171        |
| <b>W (<math>K\sigma</math>)</b>  | 0.5  | 0.5    | 0.5     | 0.4        |
| <b>Q (<math>\mu T</math>)</b>    | 2276 | 2888   | 14.4    | 57.7       |
| <b>n</b>                         | 0.9  | 0.9    | 0.8     | 0.7        |

## Supplementary Materials

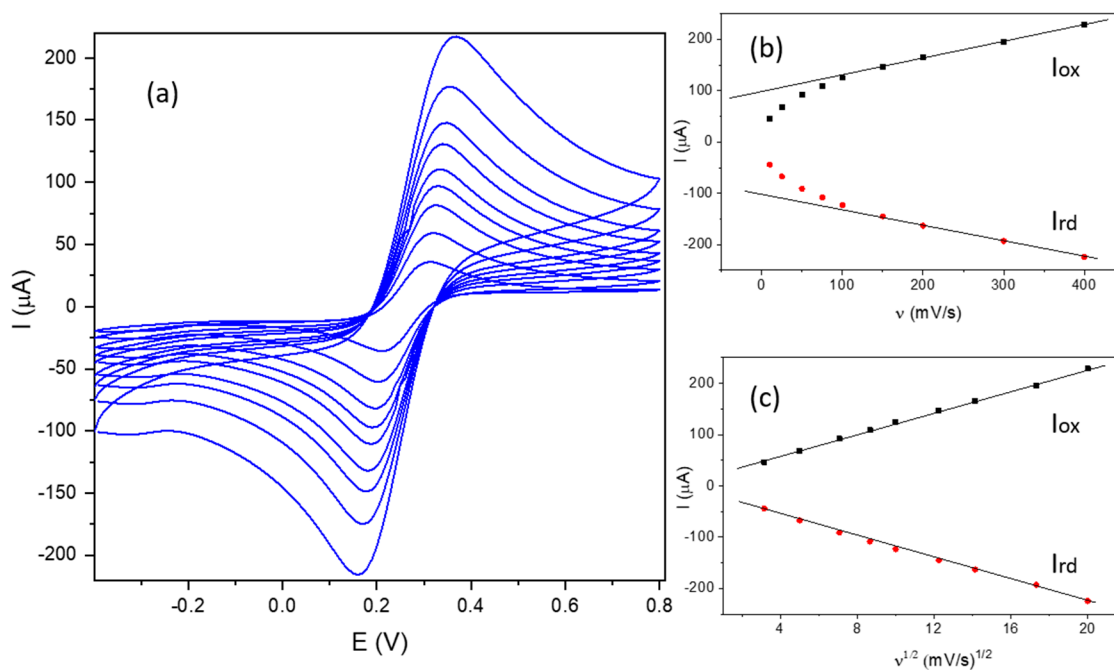

**Figure S3.** Cyclic voltammograms of the GCE/CNT/Au electrode (a) at different scan rate in 5 mM ferro/ferricyanide solution implemented with 0.1 M KCl. Anodic and cathodic peak intensity currents against de scan rate (b) and the square root of the scan rate (c).

## Supplementary Materials

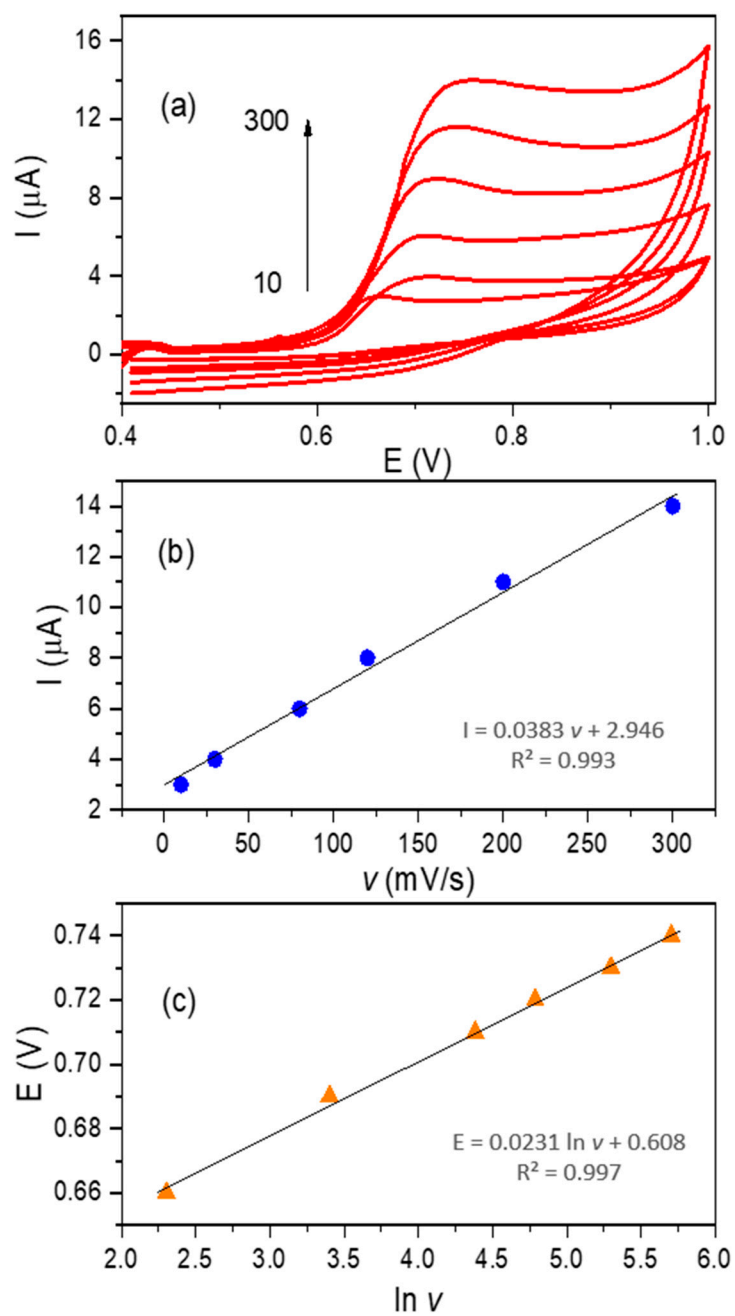

**Figure S4.** (a) Cyclic voltammograms of the GCE/CNT/Au electrode at different scan rate ( $v$ ): 10, 30, 80, 120, 200, 300 mV/s, in 50  $\mu$ M BPA 0.01 M PBS (pH = 7). (b) Anodic peak intensity currents against  $v$ . (c) Anodic peak potential shift against the  $\ln v$ .

## Supplementary Materials

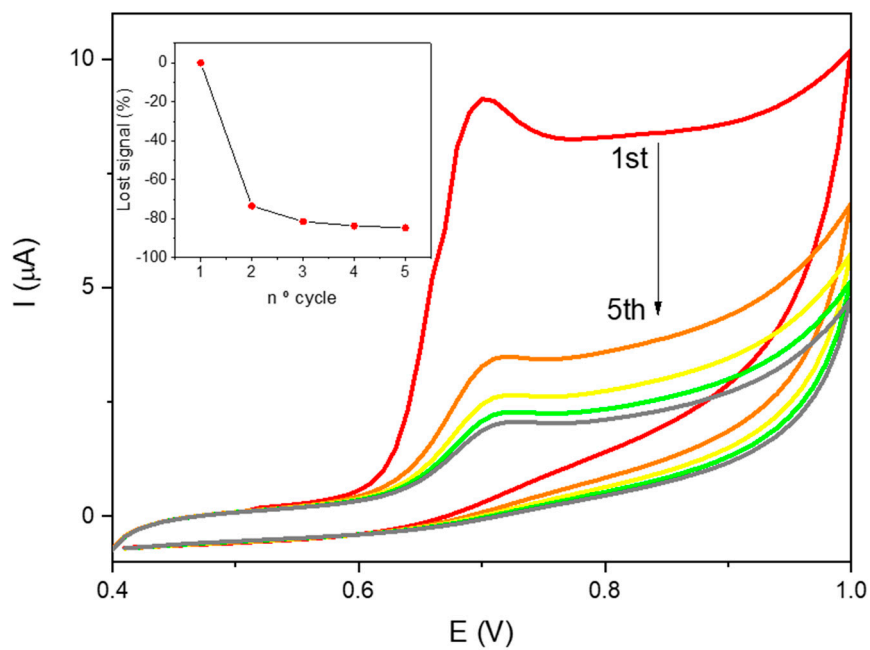

**Figure S5.** Cyclic voltammograms (CV) of GCE/CNT/Au for consecutive scans in a 50  $\mu\text{M}$  BPA solution in 0.01 M phosphate buffer solution. *Inset: percent of the signal decrease after each cycle.*

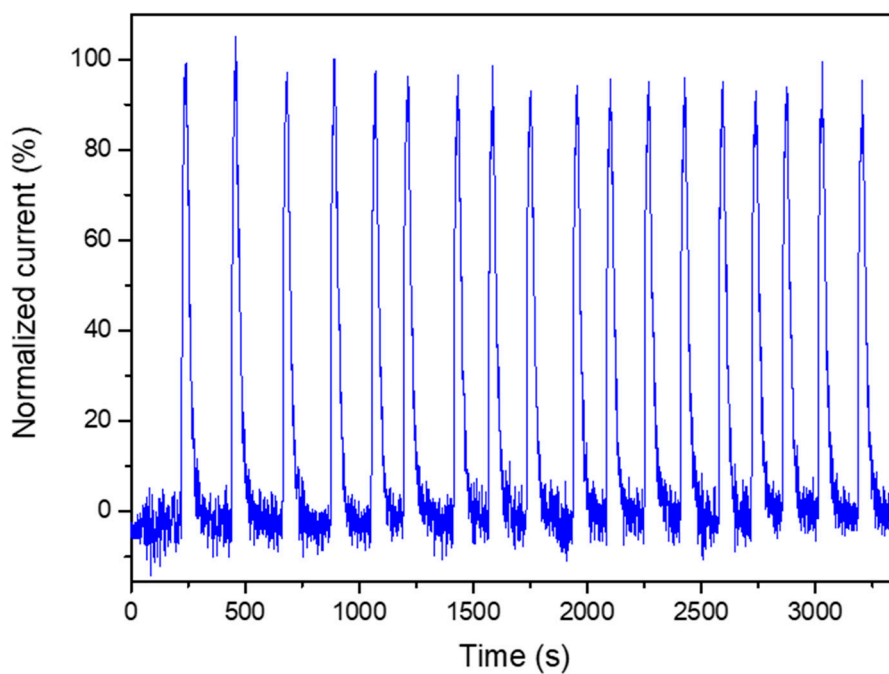

**Figure S6.** Eighteen successive injection of 1  $\mu\text{M}$  BPA solution in 0.01 M phosphate buffer solution).

## Supplementary Materials

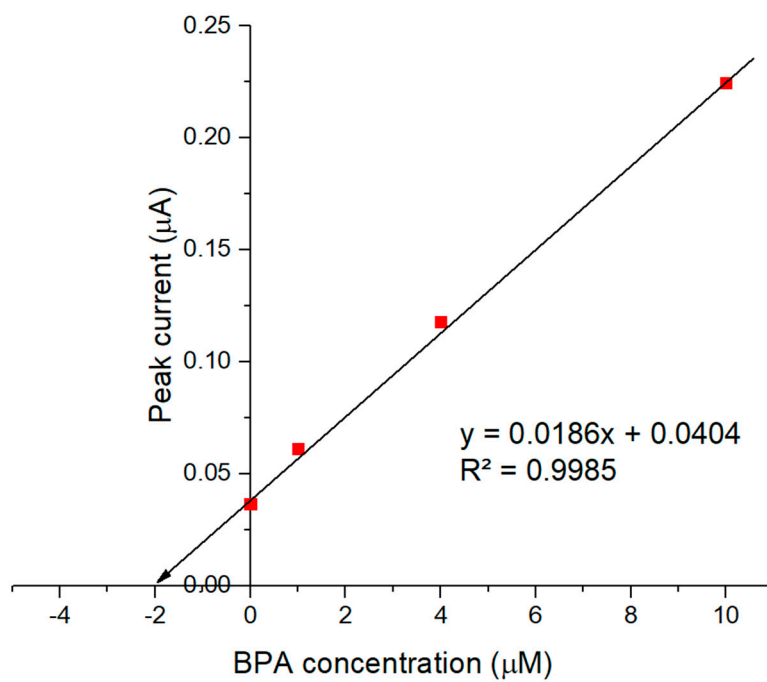

**Figure S7.** Standard calibration curve and water samples concentration estimation (sample 1) from the x-intercept.
